# Supplementary material for: Structure of a retinal chromophore of dark-adapted middle rhodopsin as studied by solid-state nuclear magnetic resonance spectroscopy
Source: PubMed Central journal article supplement — Biophys Physicobiol. 2021 Jul 14;18:177–85. doi: 10.2142/biophysico.bppb-v18.019 (PMC8354847; doi:10.2142/biophysico.bppb-v18.019), 2021-07-14
Supplement: bppb-v18.019_supplement.pdf [file bppb-v18.019_supplement.pdf]

**Supplementary Table S1.**  $^{13}\text{C}$  chemical shift values of retinal chromophores in microbial rhodopsin#

| Rhodopsin                  | Configuration                      | Chemical shift / ppm |                     |
|----------------------------|------------------------------------|----------------------|---------------------|
|                            |                                    | 20- $^{13}\text{C}$  | 14- $^{13}\text{C}$ |
| MR†                        | 13- <i>trans</i> , 15- <i>anti</i> | 14.6                 | 124.5               |
|                            | 13- <i>cis</i> , 15- <i>syn</i>    | 23.0                 | 116.1               |
| BR <sup>a</sup>            | 13- <i>trans</i> , 15- <i>anti</i> | 15.1                 | 125.1               |
|                            | 13- <i>cis</i> , 15- <i>syn</i>    | 24.2                 | 112.0               |
| <i>SrSRI</i> <sup>b</sup>  | 13- <i>trans</i> , 15- <i>anti</i> | 15.8                 | -                   |
| KR2 <sup>c</sup>           | 13- <i>trans</i> , 15- <i>anti</i> | 16.2                 | 122.5               |
| <i>NpSRII</i> <sup>d</sup> | 13- <i>trans</i> , 15- <i>anti</i> | 15.5                 | 123.5               |
| ASR <sup>e</sup>           | 13- <i>trans</i> , 15- <i>anti</i> | 16.6                 | -                   |

†: This work

#: All  $^{13}\text{C}$  chemical shift values were re-calibrated using the reference of DSS.

References: a [24]. b [33]. c [40]. d [32]. e [26].
